# Supplementary material for: Ganglioside GM1 contributes to extracellular/intracellular regulation of insulin resistance, impairment of insulin signaling and down-stream eNOS activation, in human aortic endothelial cells after short- or long-term exposure to TNFα
Source: PubMed Central journal article supplement (PMC5814158; doi:10.18632/oncotarget.23726), 2017-12-15
Supplement: oncotarget-09-5562-s001.pdf [file oncotarget-09-5562-s001.pdf]

## Ganglioside GM1 contributes to extracellular/intracellular regulation of insulin resistance, impairment of insulin signaling and down-stream eNOS activation, in human aortic endothelial cells after short- or long-term exposure to TNF $\alpha$

### SUPPLEMENTARY MATERIALS

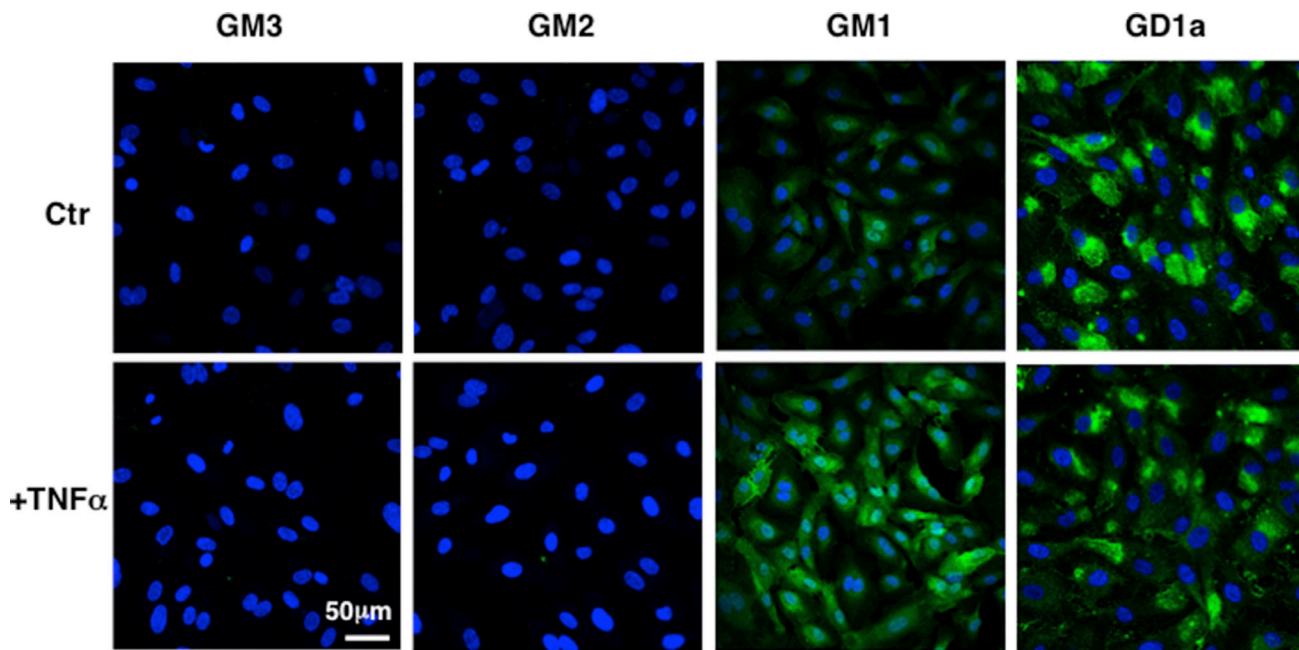

**Supplementary Figure 1: Expression levels of gangliosides.** Immunocytochemical staining of gangliosides (GM3, GM2, GM1 and GD1a) performed in short-term (3 days) 1 ng/ml TNF $\alpha$ -treated HAECs. Representative images are shown (gangliosides, *green*; DAPI, *blue*). Control (Ctr): untreated cells.

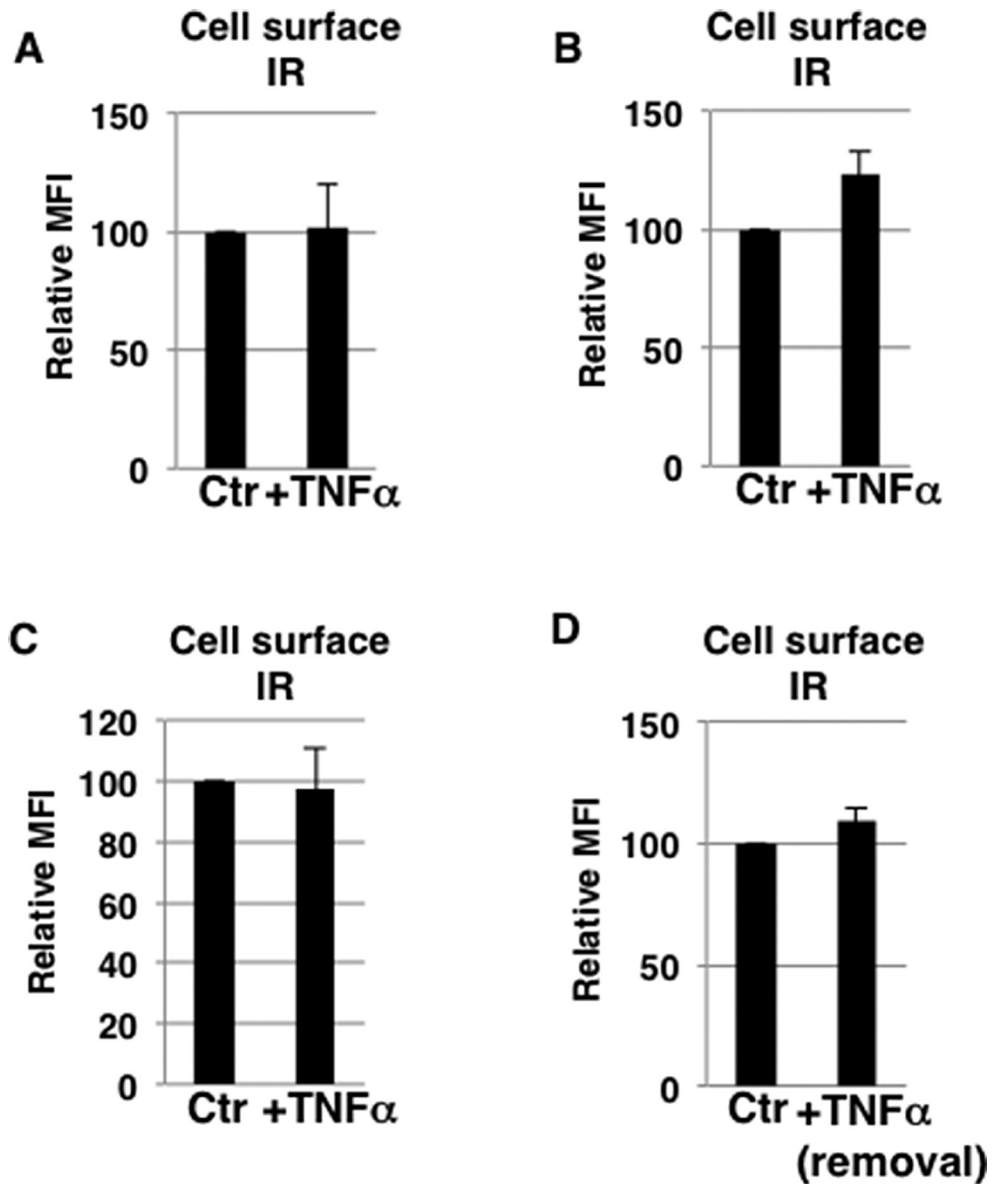

**Supplementary Figure 2: Expression levels of cell surface IR $\alpha$  do not change upon TNF $\alpha$  exposure.** FACS analysis for cell surface IR $\alpha$  of control and TNF $\alpha$ -treated HAECs [(A) 1 ng/ml TNF $\alpha$  (3 days), (B) 1 ng/ml TNF $\alpha$  (7 days), (C) 10 ng/ml TNF $\alpha$  (3 days), (D) 10 ng/ml TNF $\alpha$  (3-day treatment and 4 days after removal)]. MFIs relative to control HAECs are shown. Results are shown after normalization to the values obtained for control HAECs. Results are presented as means  $\pm$  standard deviation (SD) from three independent experiments. Control (Ctr): untreated cells.

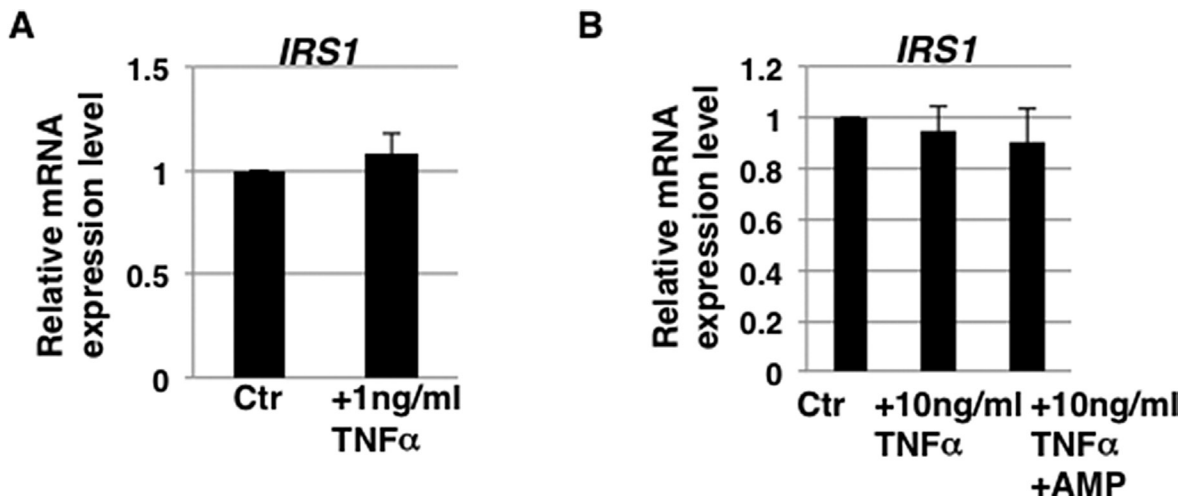

**Supplementary Figure 3: Expression levels of IRS1 do not change upon TNF $\alpha$  exposure.** Real-time PCR analysis of *IRS1* performed using cDNA derived from short-term (3 days) 1 ng/ml TNF $\alpha$ -treated HAECs (A) or short-term (3 days) 10 ng/ml TNF $\alpha$ -treated HAECs with or without AMP-dNM treatment (B). Results are shown after normalization to the values obtained for control HAECs (value = 1). Results are presented as means  $\pm$  standard deviation (SD) from three independent experiments. Control (Ctr): untreated cells.

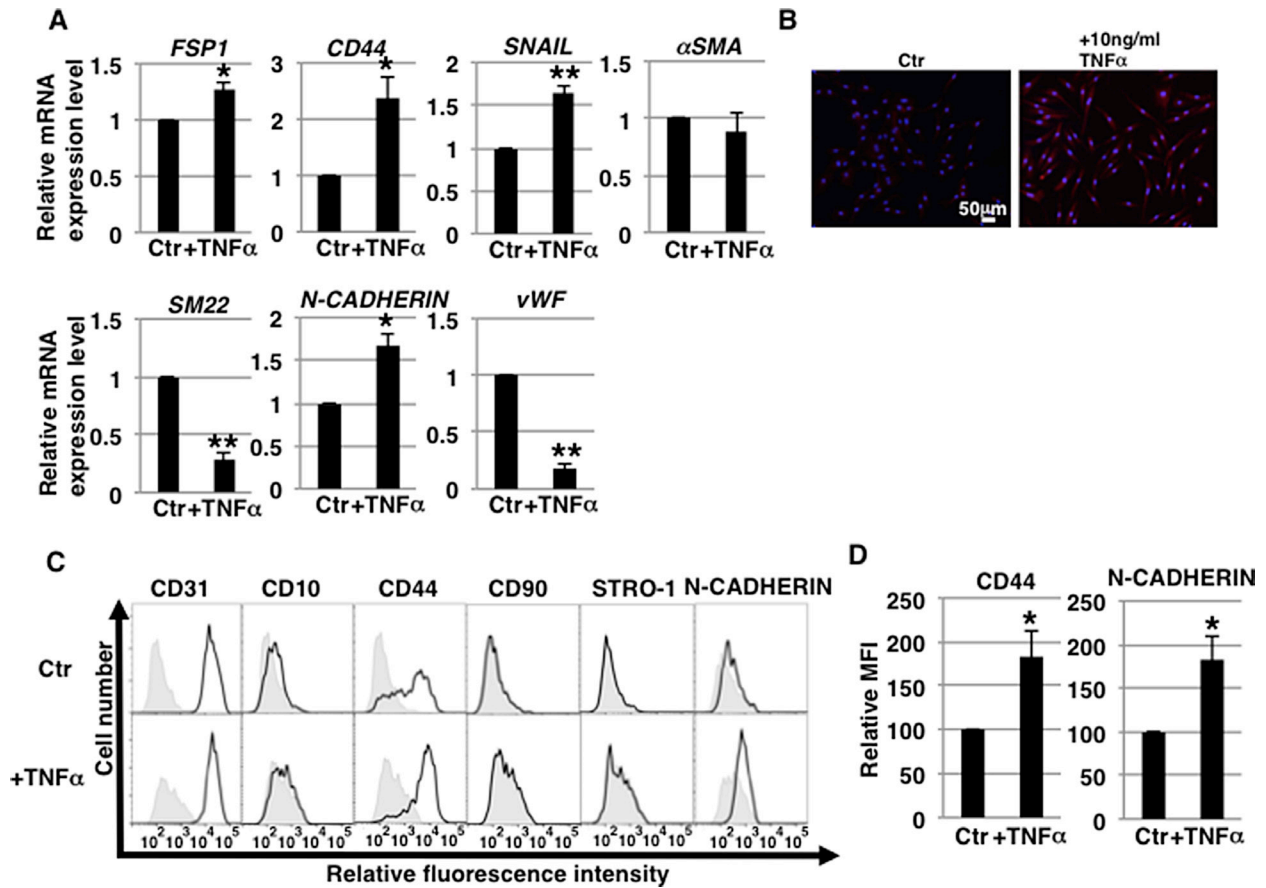

**Supplementary Figure 4: EndMT-like differentiation is induced in 10 ng/ml TNF $\alpha$ -treated HAECs.** (A) Real-time PCR analysis of EndMT markers (fibroblast marker, *FSP1*; mesenchymal markers, *CD44*, *SNAIL*, *N-CADHERIN* and  $\alpha$ *SMA*; smooth muscle cell marker, *SM22*; endothelial marker, *vWF*) performed using cDNA derived from control and short-term (3 days) 10 ng/ml TNF $\alpha$ -treated HAECs. Results shown were normalized against values obtained for control HAECs (value = 1). Results are presented as means  $\pm$  SD from three independent experiments. (B) Immunocytochemical staining of FSP1 performed in short-term (3 days) 10 ng/ml TNF $\alpha$ -treated HAECs. Representative images are shown (FSP1, red; DAPI, blue). (C and D) FACS analysis of cell surface markers (mesenchymal markers, CD44 and N-CADHERIN; mesenchymal stem cell markers, CD10, CD90 and STRO-1; endothelial marker, CD31) performed for short-term (3 days) 10 ng/ml TNF $\alpha$ -treated HAECs. Representative results are shown (C). Controls are depicted by thin gray lines. MFIs relative to control HAECs of three independent experiments are shown (D). \* $P < 0.05$ ; \*\* $P < 0.01$ . Control (Ctr): untreated cells.

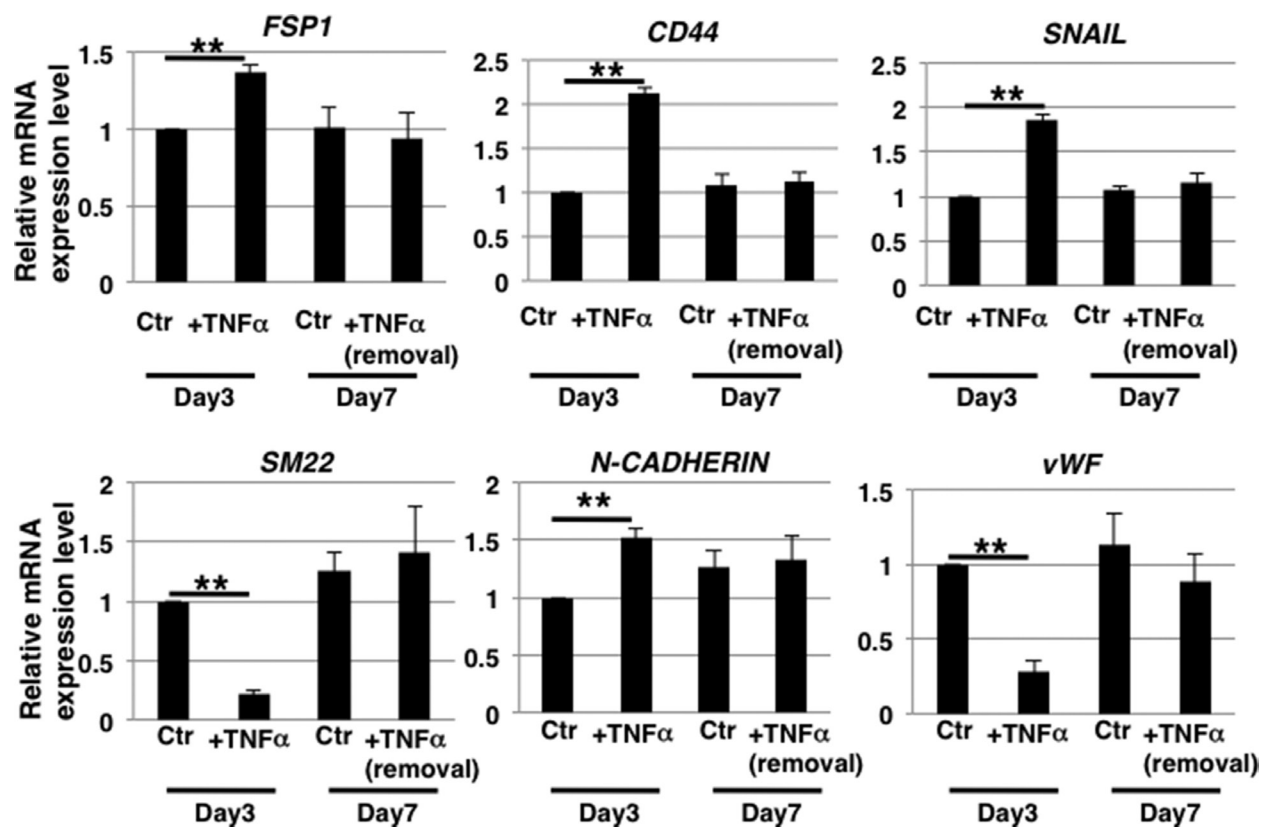

**Supplementary Figure 5: EndMT-like differentiation in short-term (3 days) 10 ng/ml TNF $\alpha$ -treated HAECs is reversible.** Real-time PCR analysis of markers for EndMT performed using cDNA derived from control, short-term (3 days) 10 ng/ml TNF $\alpha$ -treated HAECs and short-term (3 days) 10 ng/ml TNF $\alpha$ -treated HAECs 4 days after removal of TNF $\alpha$ . Results shown were normalized against values obtained for control HAECs (value = 1). Results are presented as means  $\pm$  SD from three independent experiments. \*\* $P$  < 0.01. Control (Ctr): untreated cells.

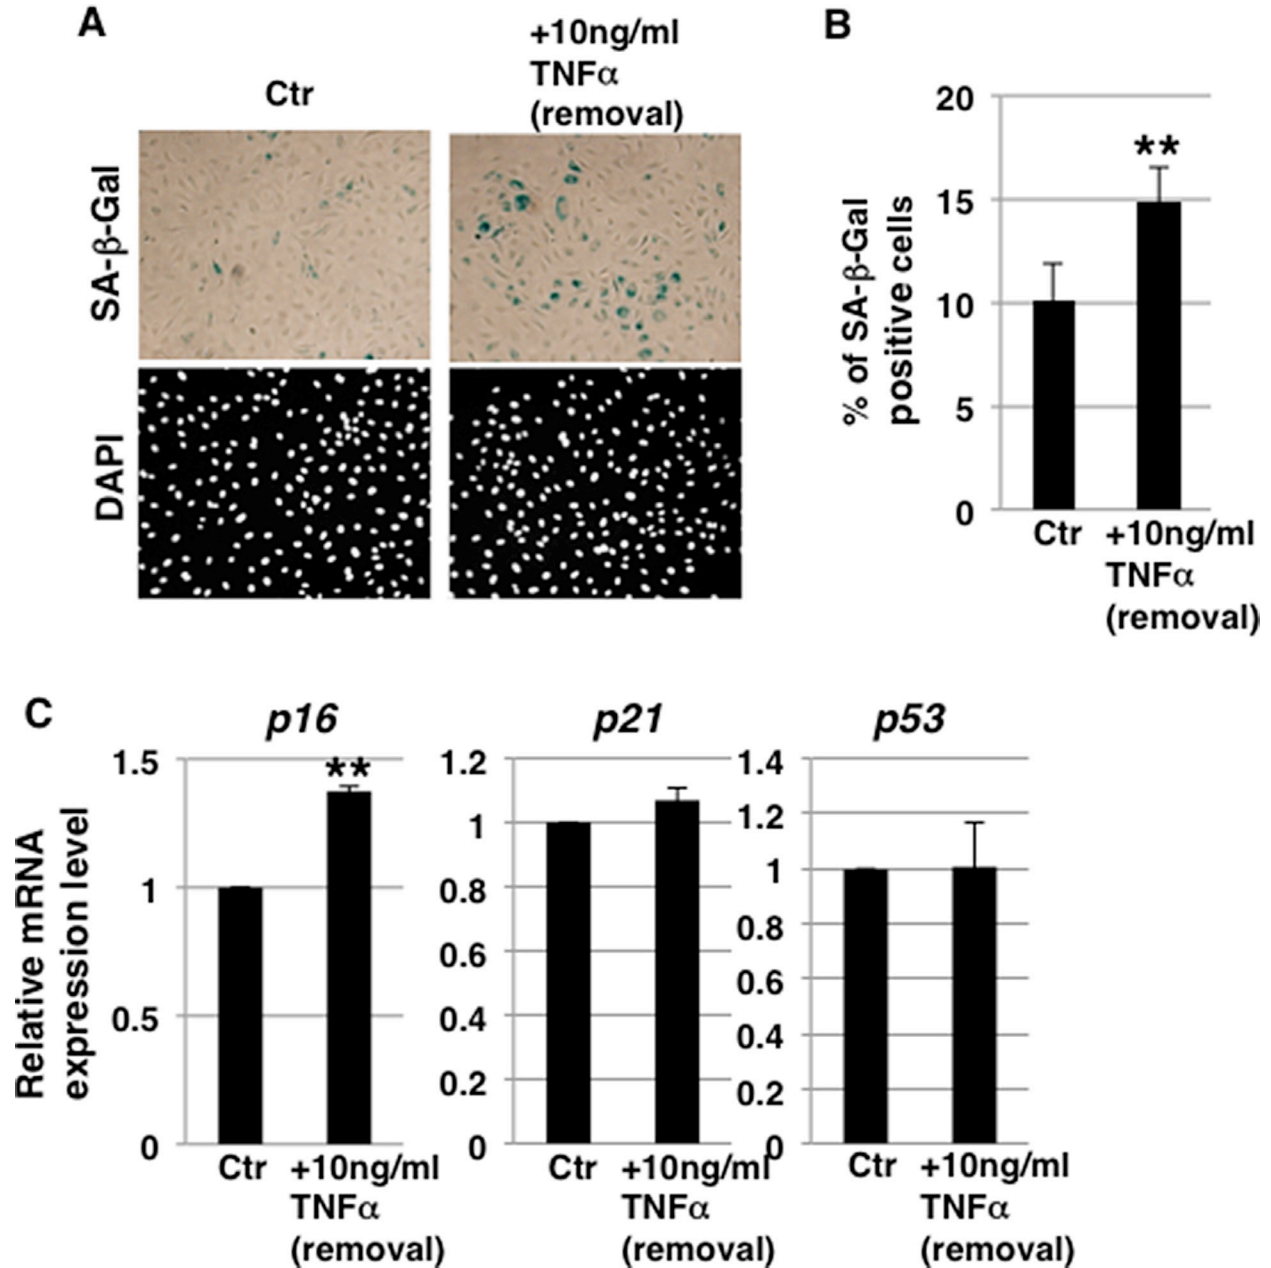

**Supplementary Figure 6: HAECs reversed from EndMT-like differentiation show partial induction of premature senescence.** (A and B) SA- $\beta$ -Gal senescence assay performed in short-term (3 days) 10 ng/ml TNF $\alpha$ -treated HAECs 4 days after removal of TNF $\alpha$  (reversed HAECs). Cells were stained for SA- $\beta$ -Gal activity and SA- $\beta$ -Gal-positive cells were quantified as percentage of total cells. Representative images of SA- $\beta$ -Gal and DAPI stainings are shown (A). Results are presented as means  $\pm$  SD from four fields (B). (C) Real-time PCR analysis of senescence markers (*p16*, *p21* and *p53*) performed using cDNA derived from control and short-term (3 days) 10 ng/ml TNF $\alpha$ -treated HAECs 4 days after removal of TNF $\alpha$ . Results shown were normalized against values obtained for control HAECs (value = 1). \*\* $P < 0.01$ . Control (Ctrl): untreated cells.

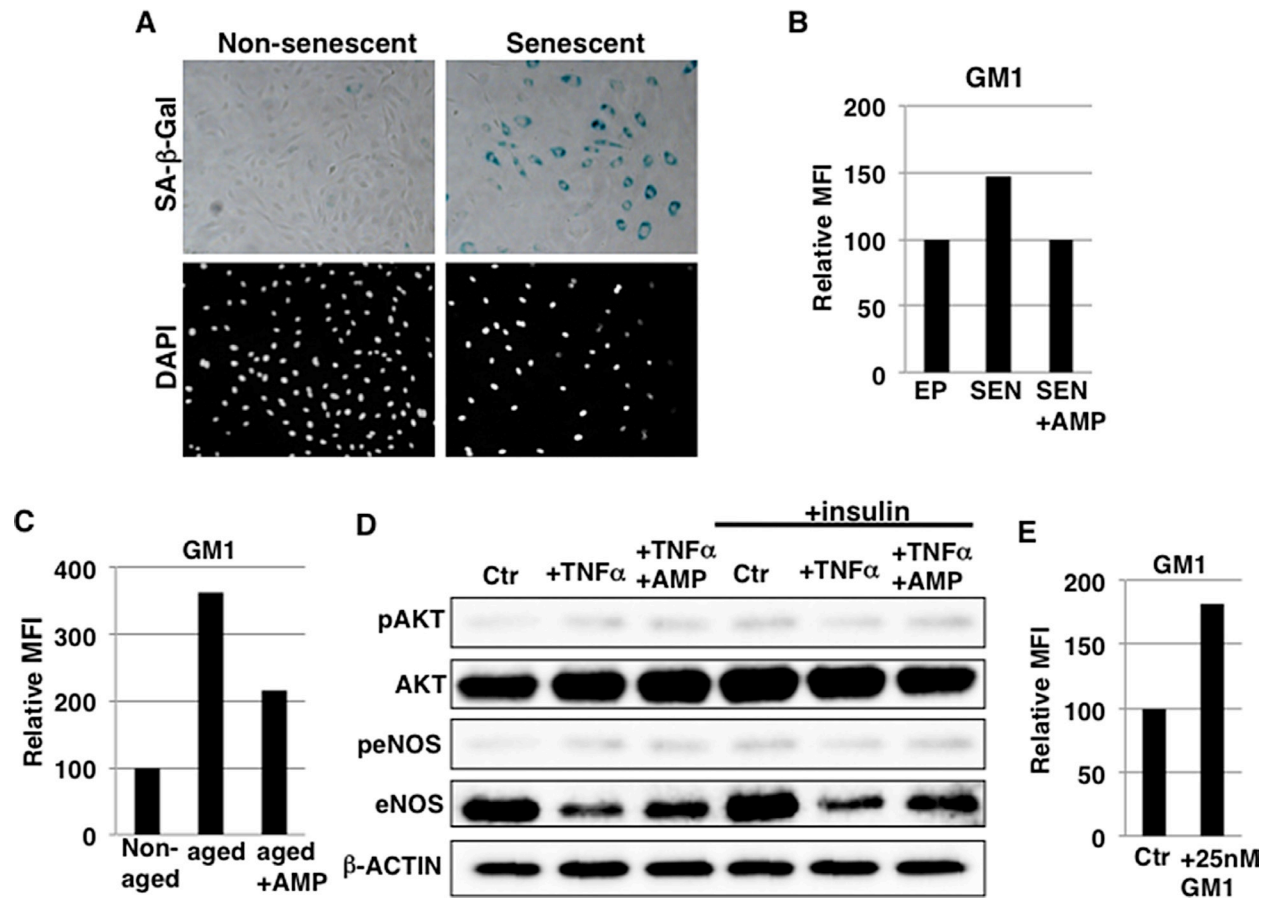

**Supplementary Figure 7: GM1 increase in aged, senescent and exogenously GM1-overexpressing HAECs.** (A) Non-senescent (EP) and senescent (SEN) HAECs stained for SA-β-Gal activity. Representative images are shown for SA-β-Gal and DAPI stainings. (B–D) Cell surface levels of GM1 in SEN-HAECs (B) and aged HAECs (C) with or without AMP-dNM treatment (3 days) and in non-aged HAECs. (D) Western blot analysis of insulin signaling performed in TNFα-treated aged HAECs with or without AMP-dNM treatment. (E) EP-HAECs cultured with or without 25 nM exogenous GM1 (24 h) analyzed by flow cytometry. MFIs relative to control HAECs are shown. Control (Ctr): untreated cells.
